# Supplementary material for: Water deteriorates lubricating oils: removal of water in lubricating oils using a robust superhydrophobic membrane
Source: Royal Society of Chemistry journal article supplement (doi:10.1039/d0nr03305g), 2020-01-01
Supplement: d0nr03305g1.pdf [file d0nr03305g1.pdf]

## Supplementary Information

### **Water deteriorates lubricating oils: removal of water in lubricating oils using robust superhydrophobic membrane**

Siyang Zhao,<sup>ad</sup> Lu Tie,<sup>a</sup> Zhiguang Guo<sup>\*ab</sup> and Jing Li<sup>\*ac</sup>

<sup>a</sup> State Key Laboratory of Solid Lubrication, Lanzhou Institute of Chemical Physics, Chinese Academy of Sciences, Lanzhou 730000, P. R. China

<sup>b</sup> Ministry of Education Key Laboratory for the Green Preparation and Application of Functional Materials, Hubei University, Wuhan 430062, P. R. China

<sup>c</sup> Hubei Province Key Laboratory of Coal Conversion and New Carbon Materials, School of Chemistry and Chemical Engineering, Wuhan University of Science and Technology, Wuhan 430081, P. R. China

<sup>d</sup> University of Chinese Academy of Sciences, Beijing 100049, P. R. China

\*E-mail: [jli@licp.cas.cn](mailto:jli@licp.cas.cn) (J. Li); [zguo@licp.cas.cn](mailto:zguo@licp.cas.cn) (Z. Guo).

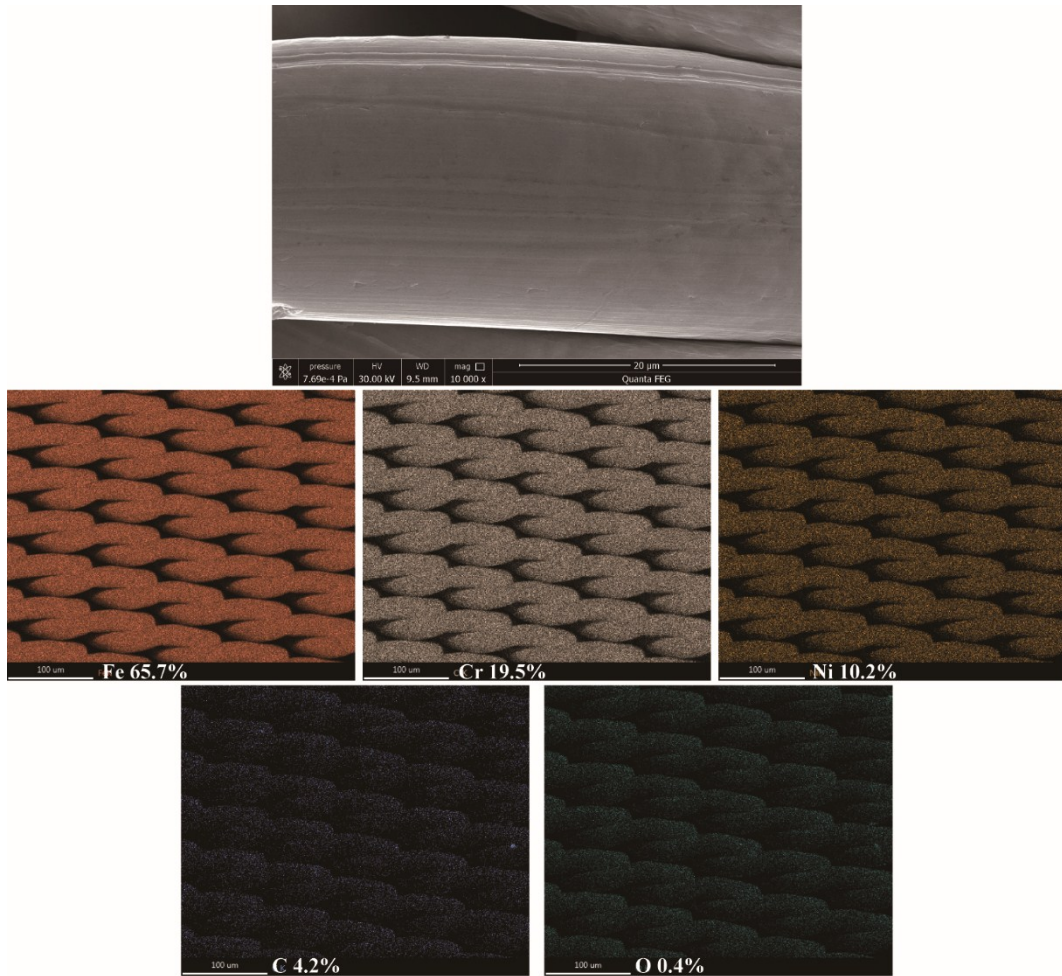

**Fig. S1** SEM image, element mapping images, and element weight percentages of original SSM.

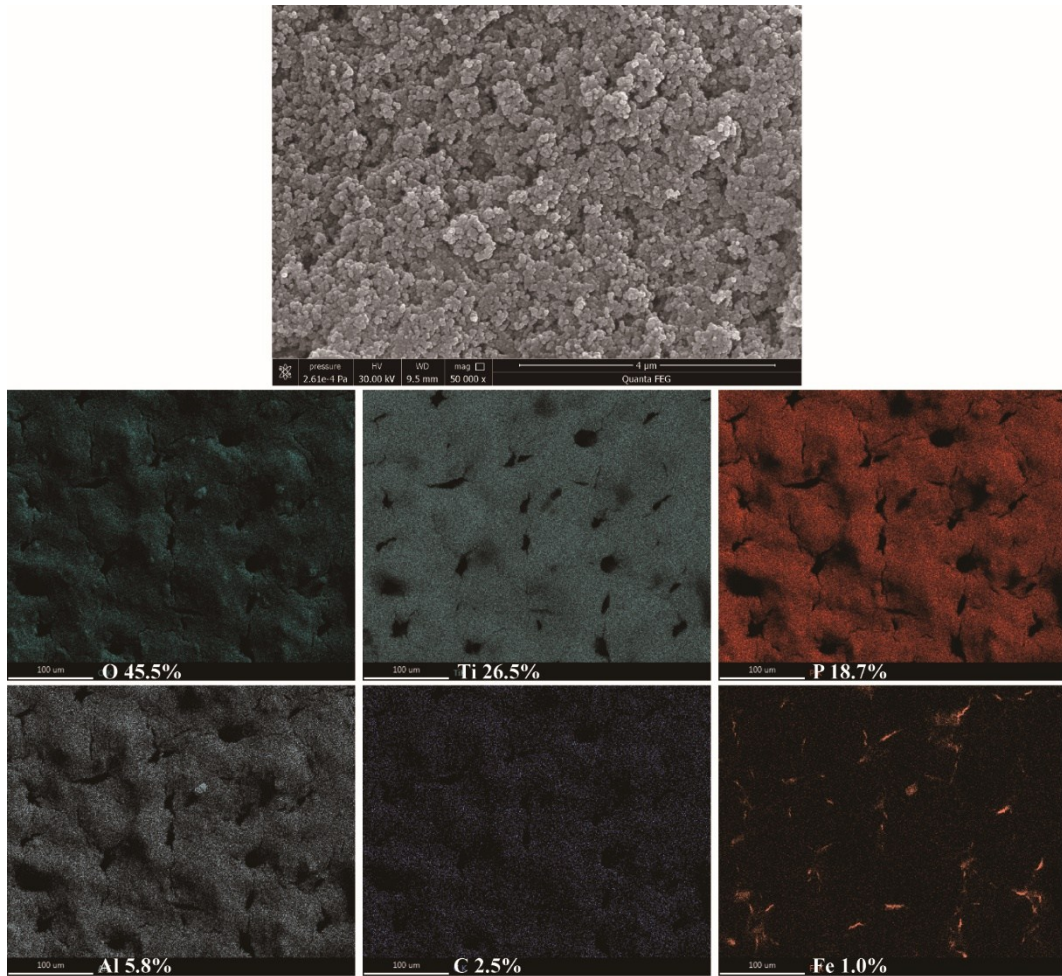

**Fig. S2** SEM image, element mapping images, and element weight percentages of AP-TiO<sub>2</sub>-coated SSM.

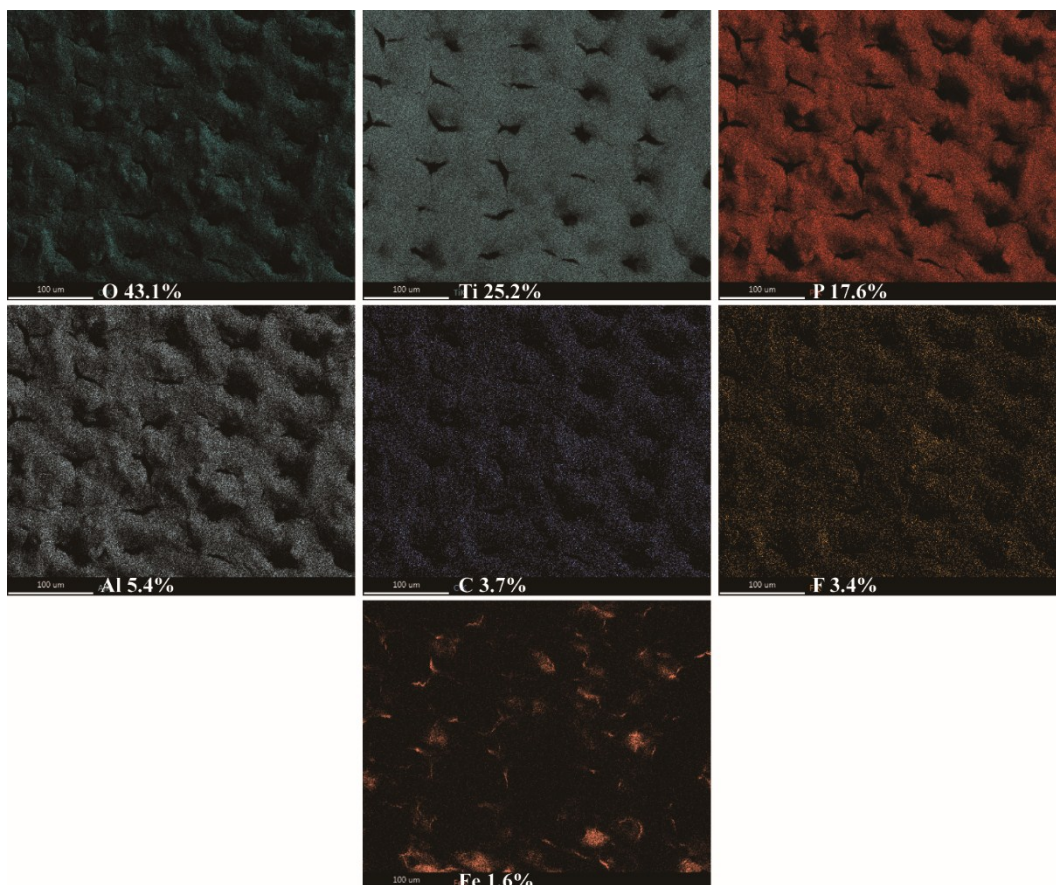

**Fig. S3** Element mapping images and element weight percentages of AP-TiO<sub>2</sub>-FOTS-coated SSM.

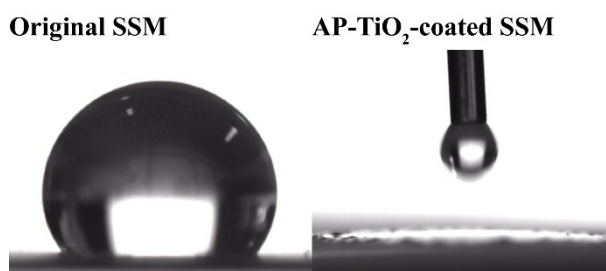

**Fig. S4** Photographs of water droplet on the surfaces of original and AP-TiO<sub>2</sub>-coated SSMs.



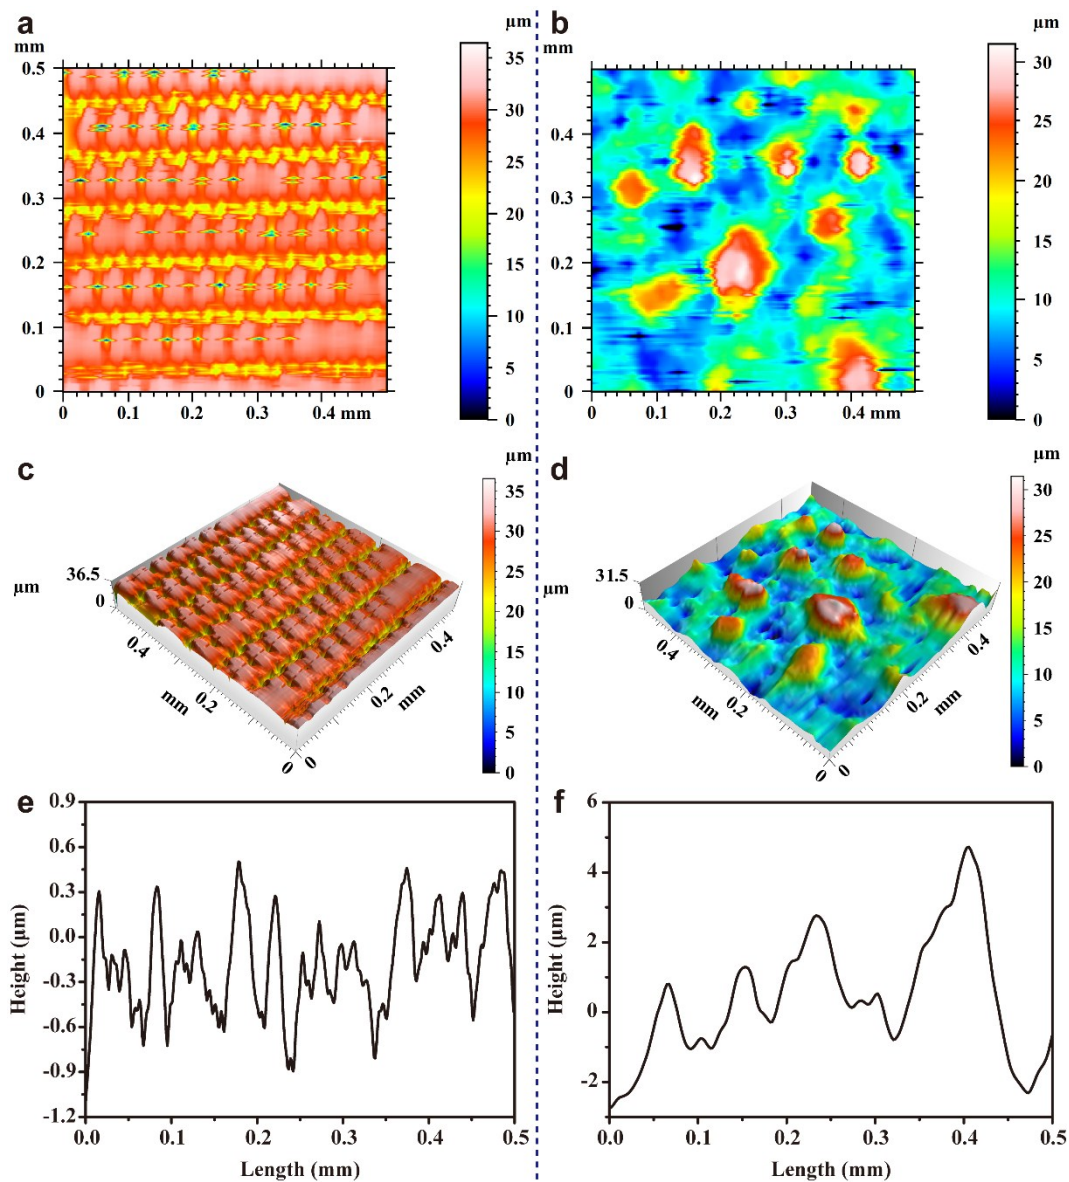

**Fig. S5** Surface topographies of original (a, c, e) and AP-TiO<sub>2</sub>-FOTS-coated (b, d, f) SSMs. (a, b) Surface 2D plain maps. (c, d) 3D height maps. (e, f) Surface topology profiles.

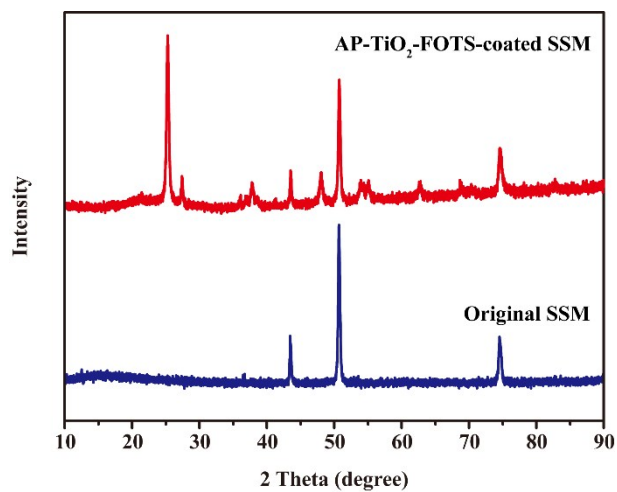

**Fig. S6** XRD patterns of original and AP-TiO<sub>2</sub>-FOTS-coated SSMs.

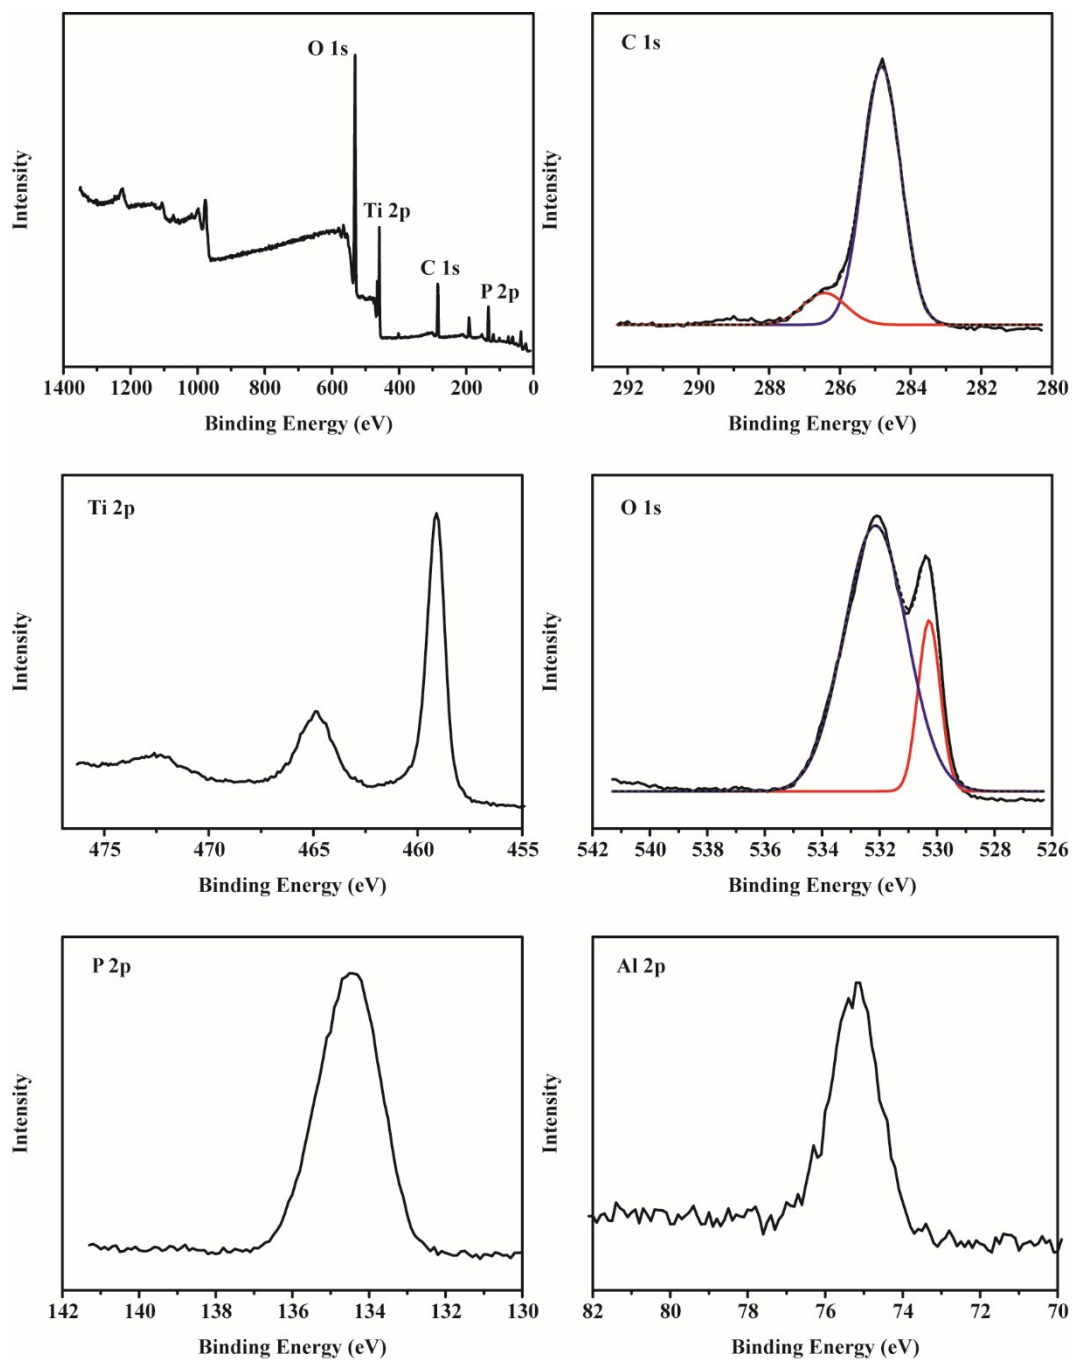

**Fig. S7** XPS spectra of AP-TiO<sub>2</sub>-coated SSM.

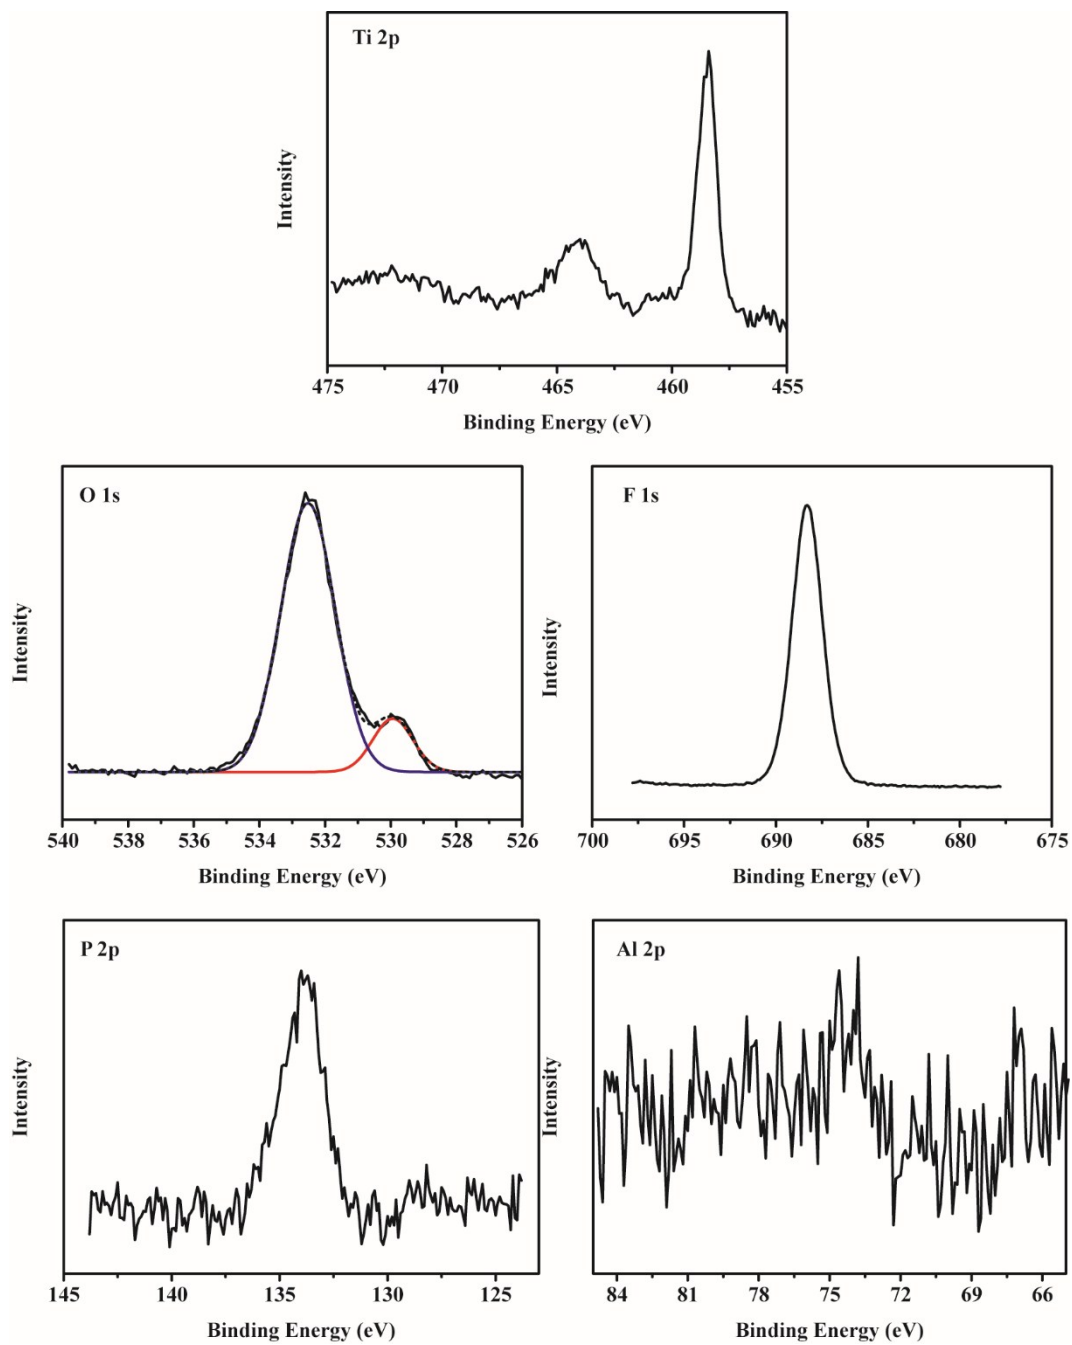

**Fig. S8** XPS spectra of AP-TiO<sub>2</sub>-FOTS-coated SSM.



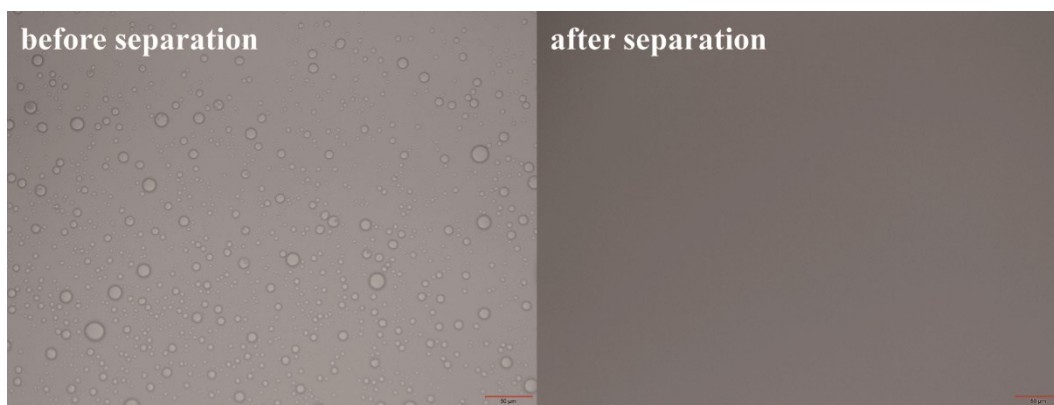

**Fig. S9** Microscope photographs of 500/1 water-containing PAO 2 before and after separation using AP-TiO<sub>2</sub>-FOTS-coated SSM.

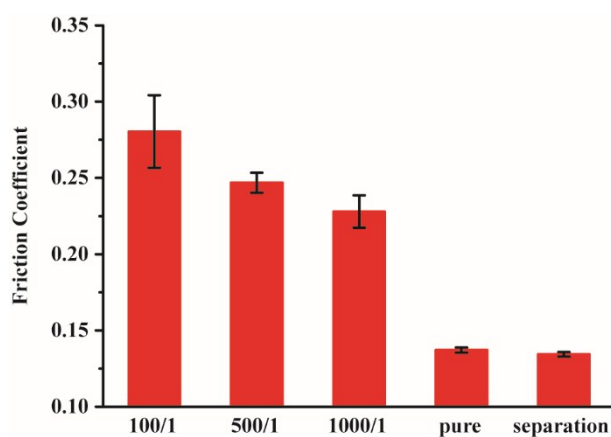

**Fig. S10** Average friction coefficient of the test pair in pure, 1000/1 water-containing, 500/1 water-containing, 100/1 water-containing PAO 2, and the purified PAO 2 after separating 500/1 water-containing PAO 2 using AP-TiO<sub>2</sub>-FOTS-coated SSM.

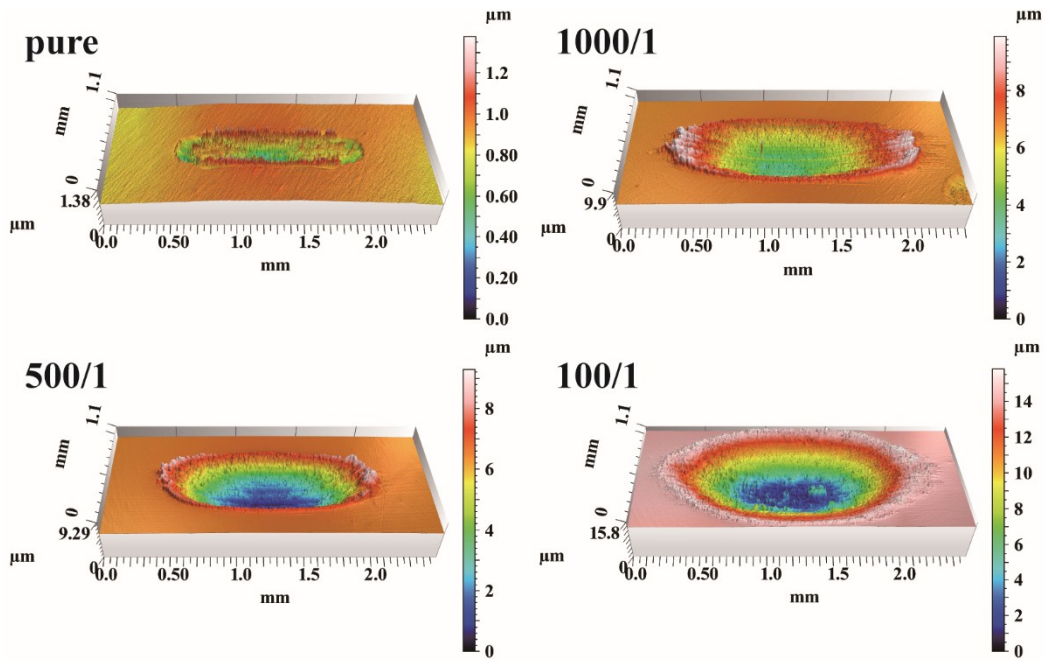

**Fig. S11** 3D optical microscopic images of wear scars after the tribological tests in pure, 1000/1 water-containing, 500/1 water-containing, and 100/1 water-containing PAO 2.

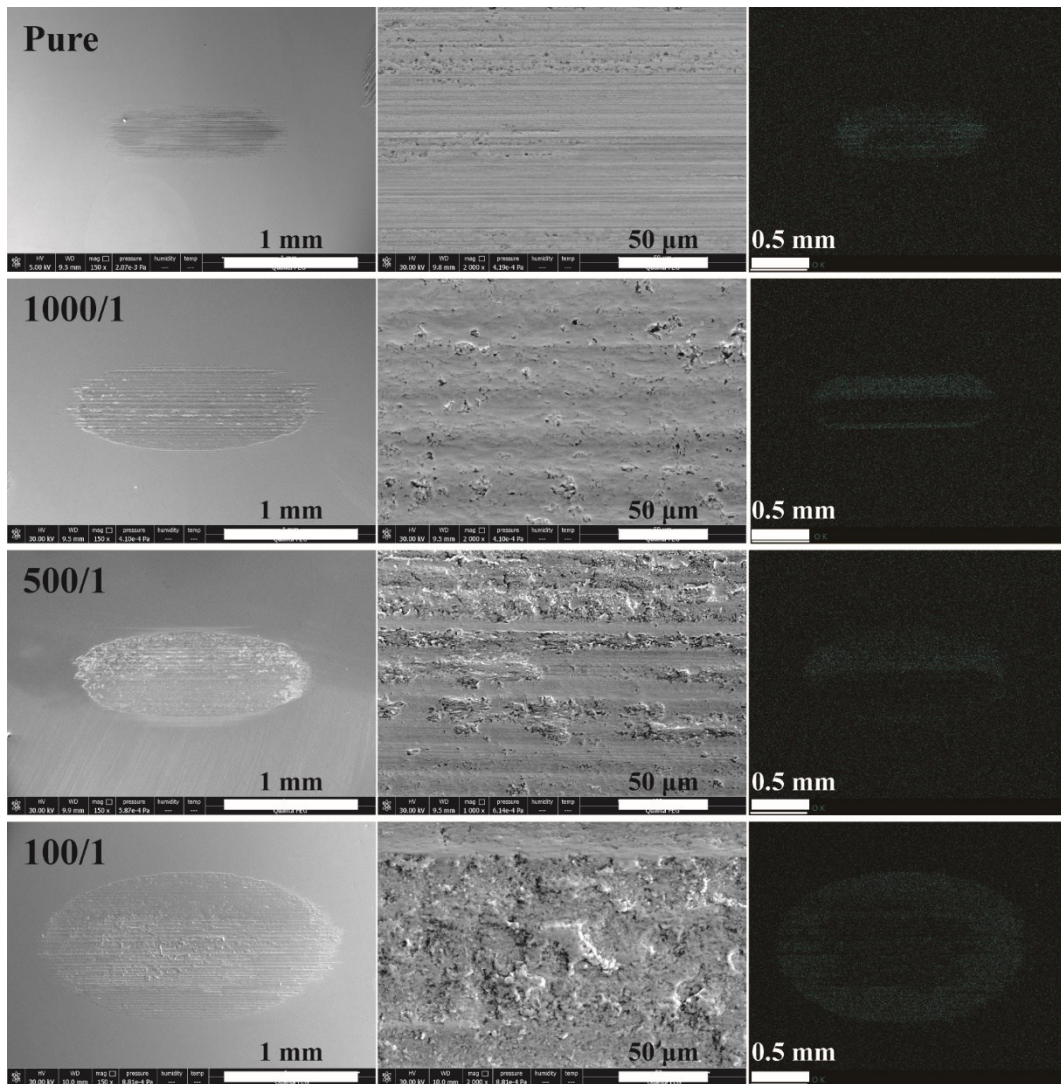

**Fig. S12** SEM images (left) and oxygen mapping images (rightmost) of wear scars after the tribological tests in pure, 1000/1 water-containing, 500/1 water-containing, and 100/1 water-containing PAO 2.

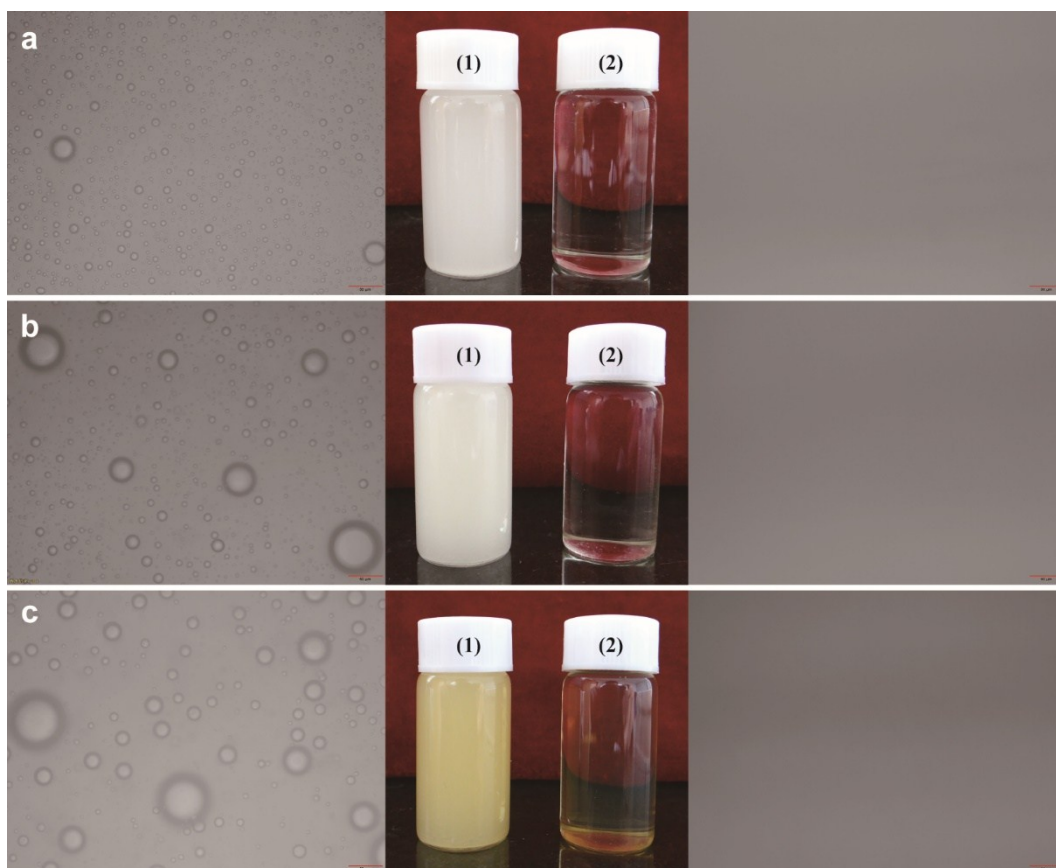

**Fig. S13** Photographs of (a) 200/1 water-containing ultra-S8, (b) 10/1 water-containing MACs, and (c) 10/1 water-containing CleanOil 150SN before (left) and after (right) separation using AP-TiO<sub>2</sub>-FOTS-coated SSM.

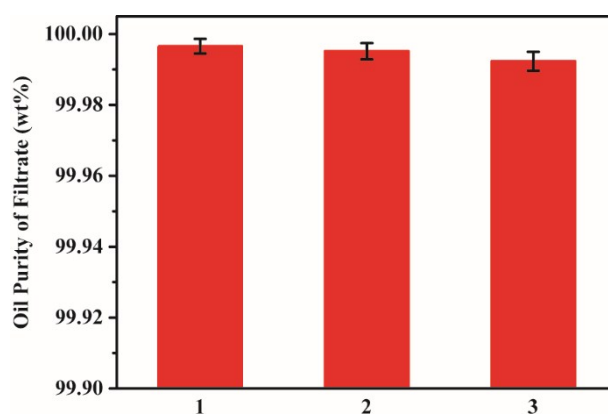

**Fig. S14** Purity of (1) 200/1 water-containing ultra-S8, (2) 10/1 water-containing MACs, and (3) 10/1 water-containing CleanOil 150SN after separation using AP-TiO<sub>2</sub>-FOTS-coated SSM.

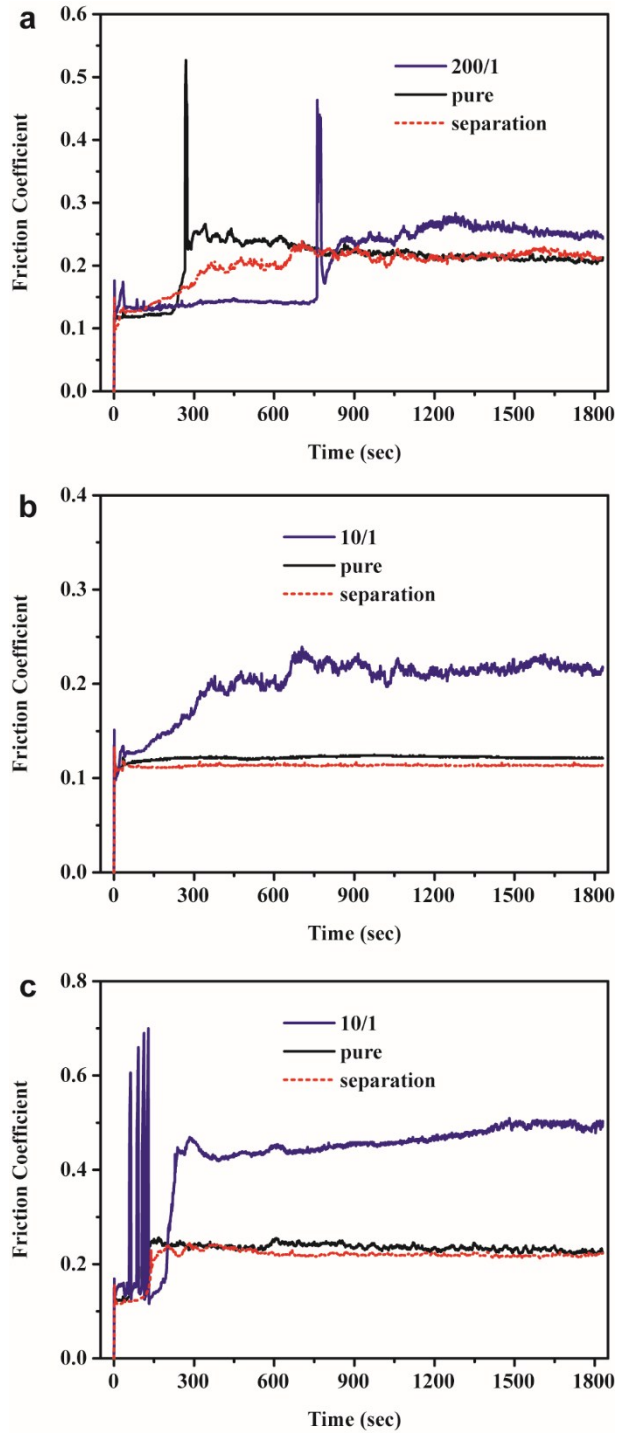

**Fig. S15** Friction coefficient of the test pair in pure, water-containing, and purified lubricating oils including (a) ultra-S8, (b) MACs, and (c) CleanOil 150SN.



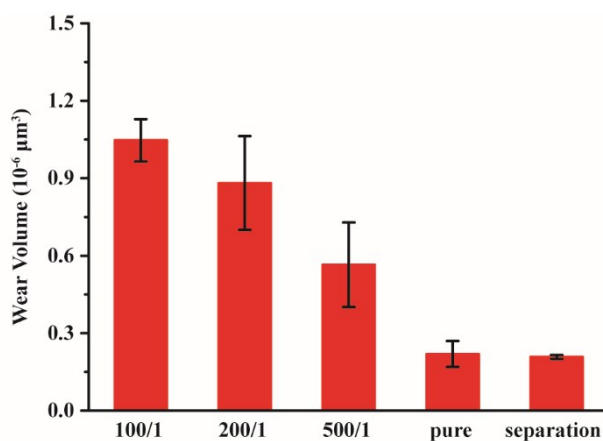

**Fig. S16** Wear volume of the test pair in pure, 500/1 water-containing, 200/1 water-containing, 100/1 water-containing ultra-S8, and the purified ultra-S8 after separating 200/1 water-containing ultra-S8 using AP-TiO<sub>2</sub>-FOTS-coated SSM.

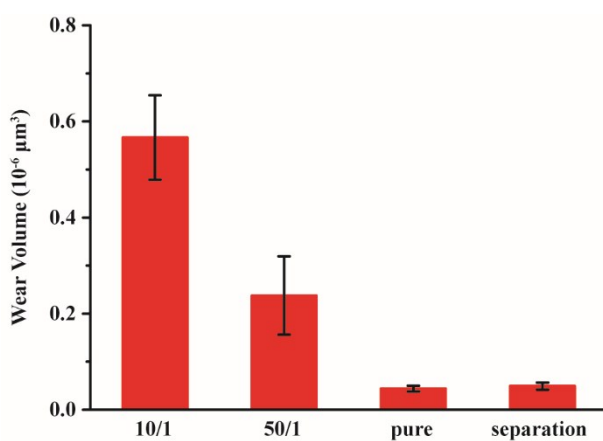

**Fig. S17** Wear volume of the test pair in pure, 50/1 water-containing, 10/1 water-containing MACs, and the purified MACs after separating 10/1 water-containing MACs using AP-TiO<sub>2</sub>-FOTS-coated SSM.

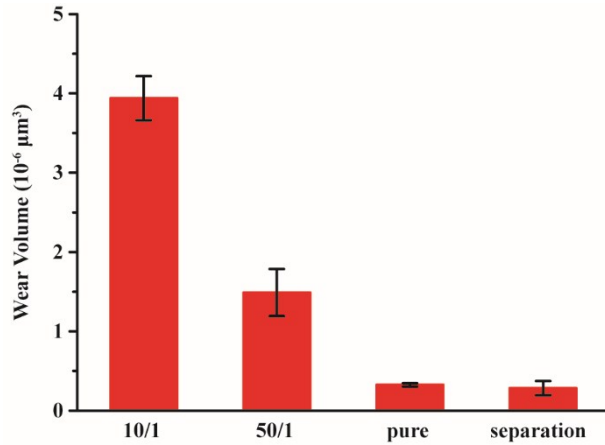

**Fig. S18** Wear volume of the test pair in pure, 50/1 water-containing, 10/1 water-containing CleanOil 150SN, and the purified CleanOil 150SN after separating 10/1 water-containing CleanOil 150SN using AP-TiO<sub>2</sub>-FOTS-coated SSM.

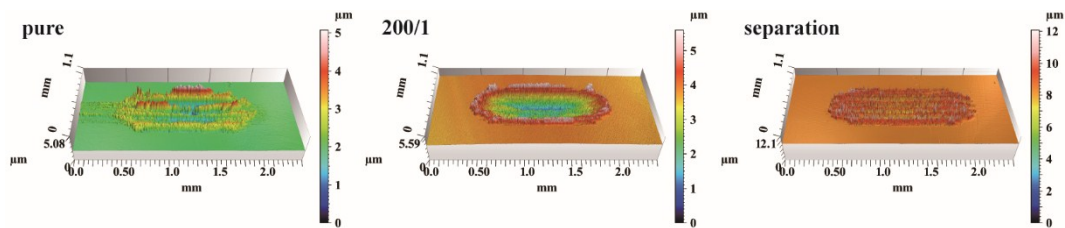

**Fig. S19** 3D optical microscopic images of wear scars after the tribological tests in pure, 200/1 water-containing ultra-S8, and the purified ultra-S8 after separating 200/1 water-containing ultra-S8 using AP-TiO<sub>2</sub>-FOTS-coated SSM.

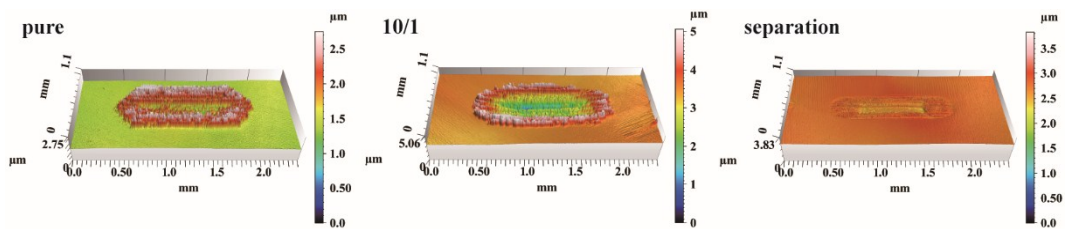

**Fig. S20** 3D optical microscopic images of wear scars after the tribological tests in pure, 10/1 water-containing MACs, and the purified MACs after separating 10/1 water-containing MACs using AP-TiO<sub>2</sub>-FOTS-coated SSM.

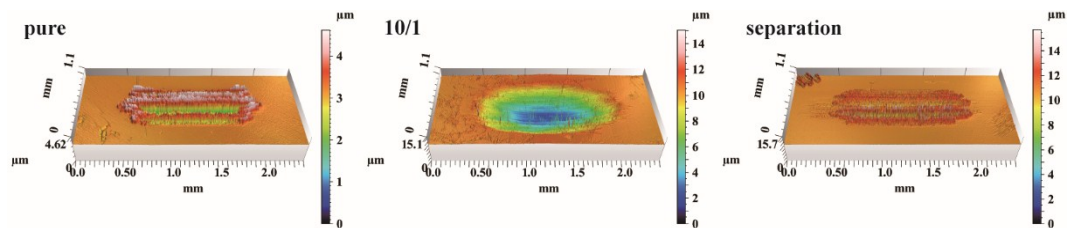

**Fig. S21** 3D optical microscopic images of wear scars after the tribological tests in pure, 10/1 water-containing CleanOil 150SN, and the purified CleanOil 150SN after separating 10/1 water-containing CleanOil 150SN using AP-TiO<sub>2</sub>-FOTS-coated SSM.

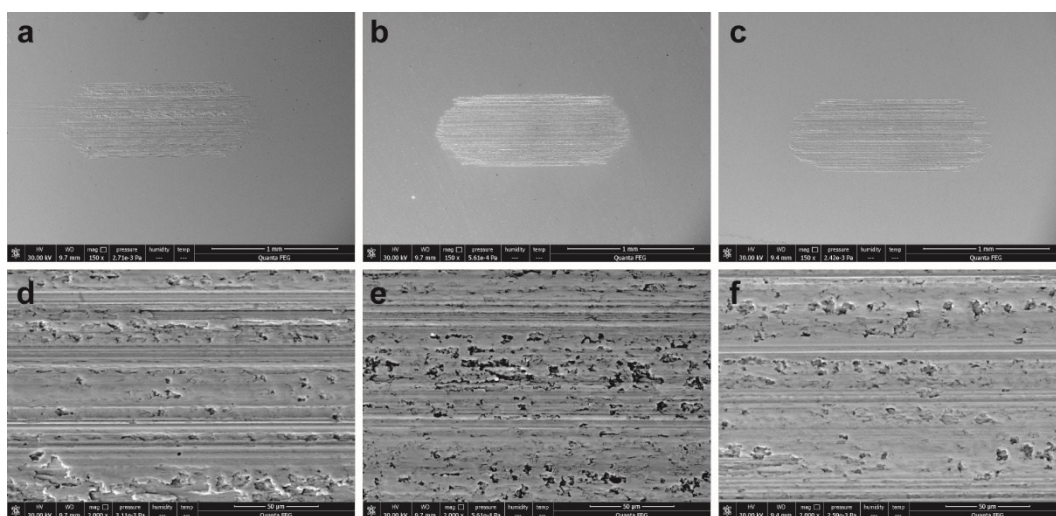

**Fig. S22** SEM images of wear scars after the tribological tests in (a, d) pure, (b, e) 200/1 water-containing ultra-S8, and (c, f) the purified ultra-S8 after separating 200/1 water-containing ultra-S8 using AP-TiO<sub>2</sub>-FOTS-coated SSM.

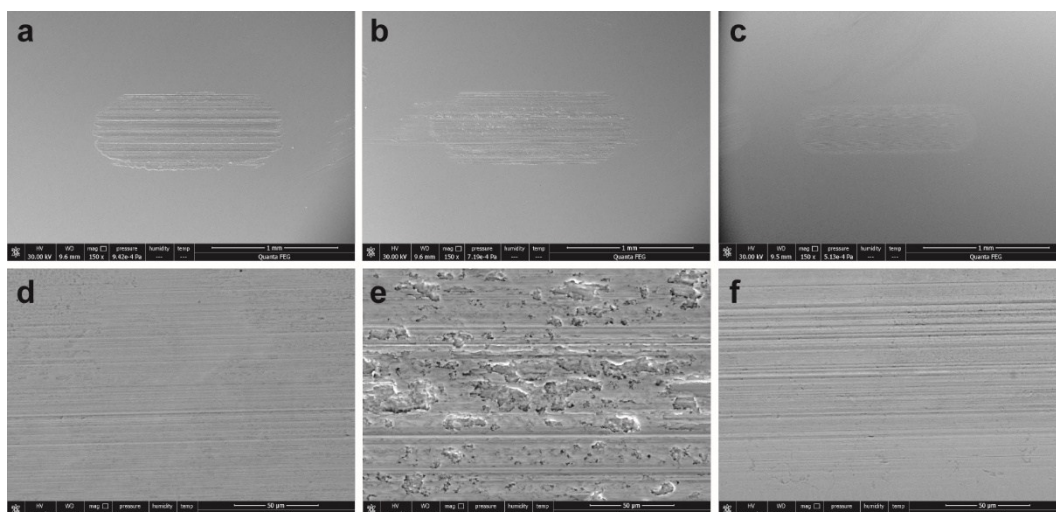

**Fig. S23** SEM images of wear scars after the tribological tests in (a, d) pure, (b, e) 10/1 water-containing MACs, and (c, f) the purified MACs after separating 10/1 water-containing MACs using AP-TiO<sub>2</sub>-FOTS-coated SSM.

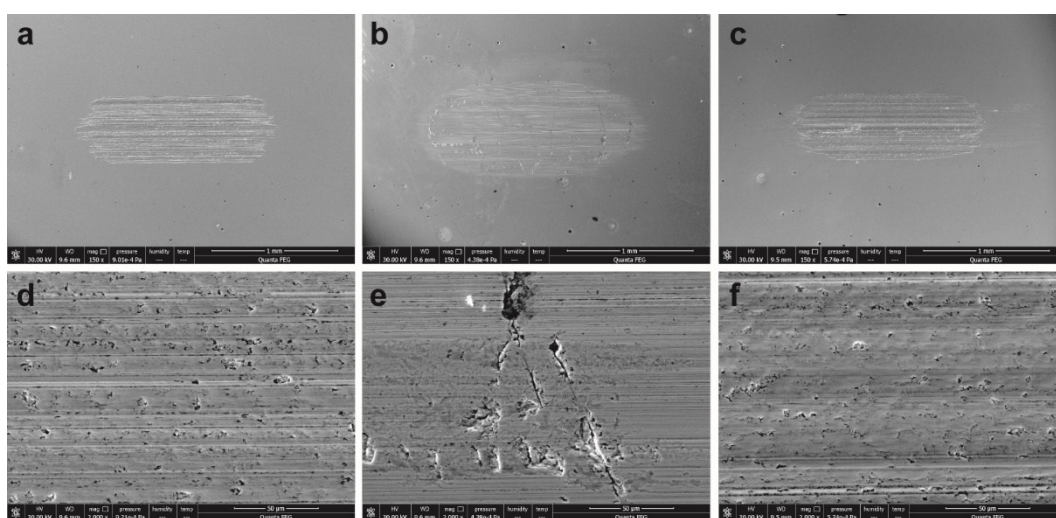

**Fig. S24** SEM images of wear scars after the tribological tests in (a, d) pure, (b, e) 10/1 water-containing CleanOil 150SN, and (c, f) the purified CleanOil 150SN after separating 10/1 water-containing CleanOil 150SN using AP-TiO<sub>2</sub>-FOTS-coated SSM.

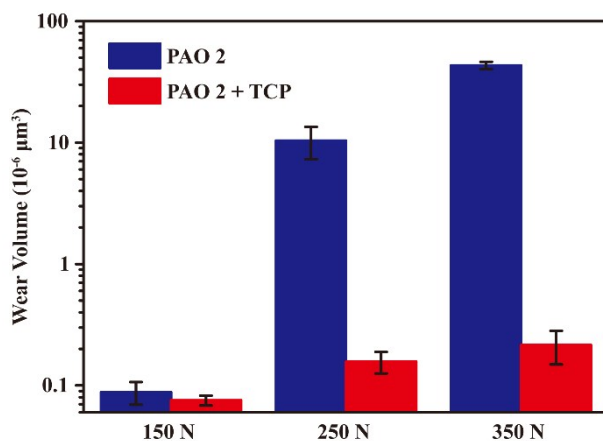

**Fig. S25** Wear volume of the test pair in PAO 2 without and with TCP at different contact pressures.

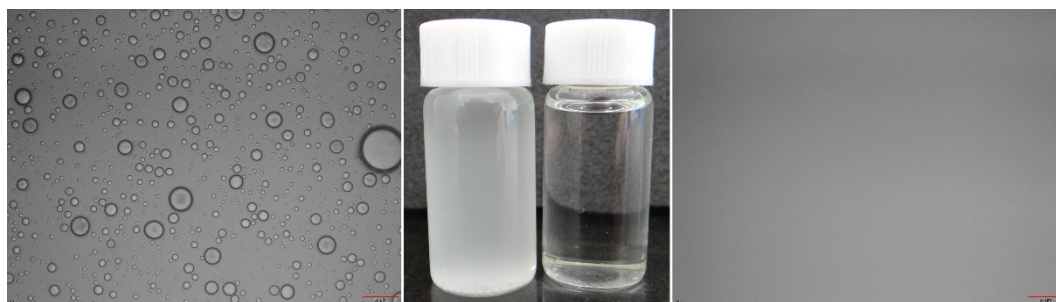

**Fig. S26** Photographs of TCP-stabilized water-in-PAO 2 (100/1) emulsion before (left) and after (right) separation using the AP-TiO<sub>2</sub>-FOTS-coated SSM.

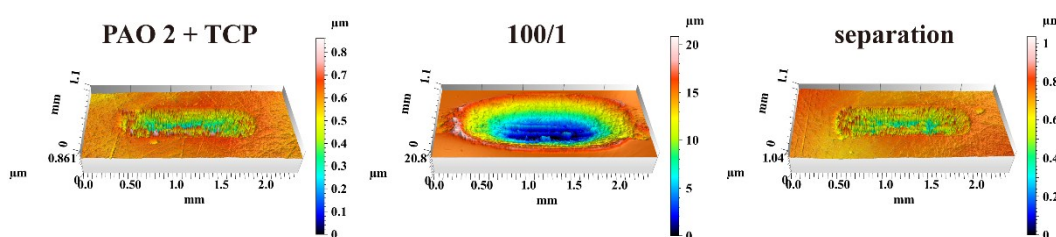

**Fig. S27** 3D optical microscopic images of wear scars after the tribological tests in TCP-containing PAO 2, TCP-stabilized water-in-PAO 2 (100/1) emulsion, and the purified PAO 2 after separating TCP-stabilized water-in-PAO 2 (100/1) emulsion using the AP-TiO<sub>2</sub>-FOTS-coated SSM. The contact pressure is 350 N.



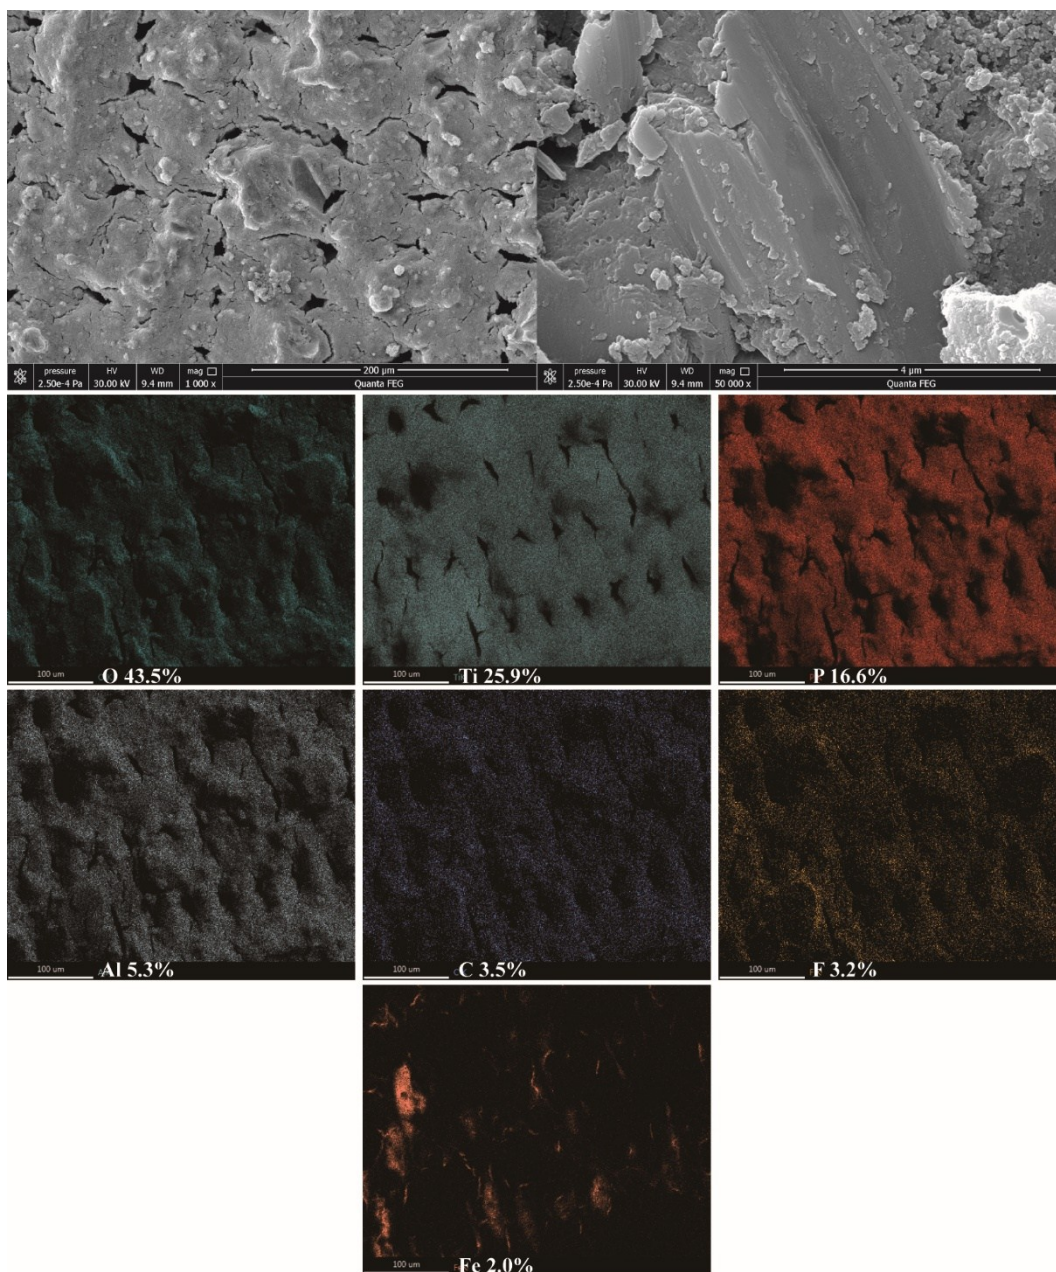

**Fig. S28** SEM images, element mapping images, and element weight percentages of AP-TiO<sub>2</sub>-FOTS-coated SSM after 50 abrasion cycles with sandpaper.

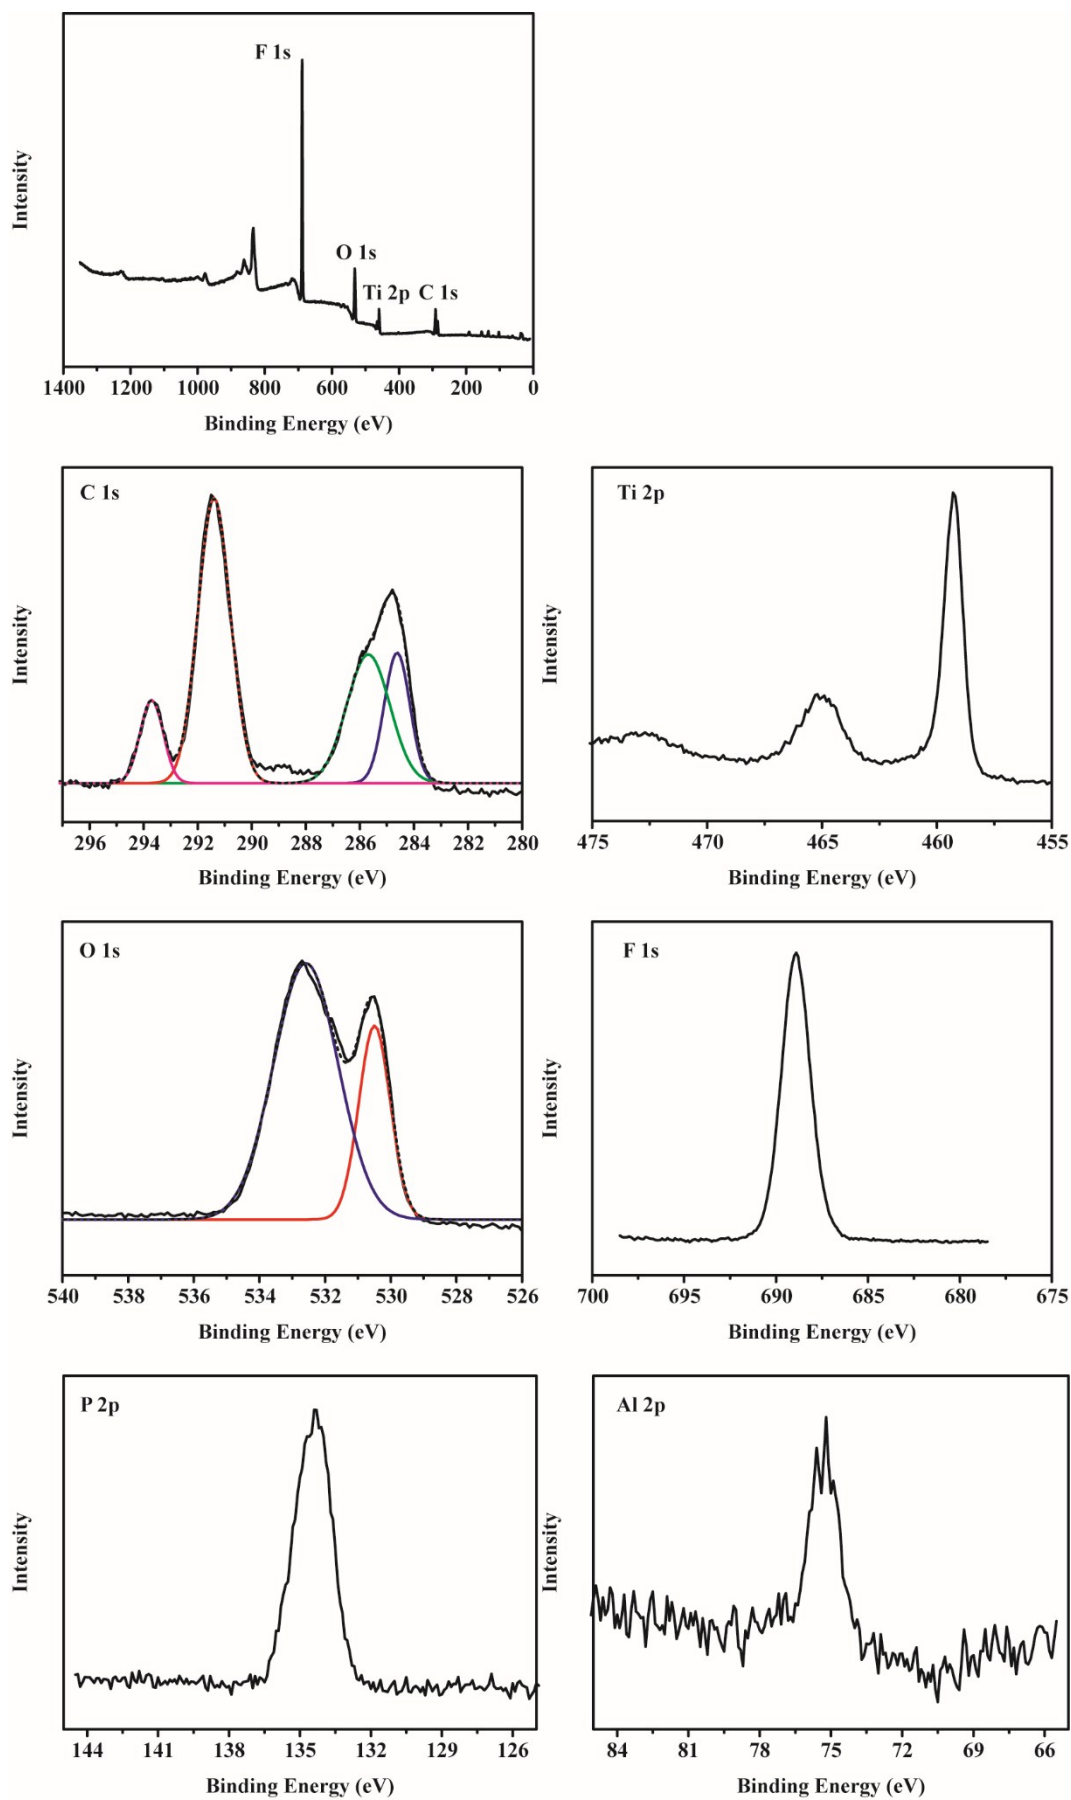

**Fig. S29** XPS spectra of AP-TiO<sub>2</sub>-FOTS-coated SSM after 50 abrasion cycles.

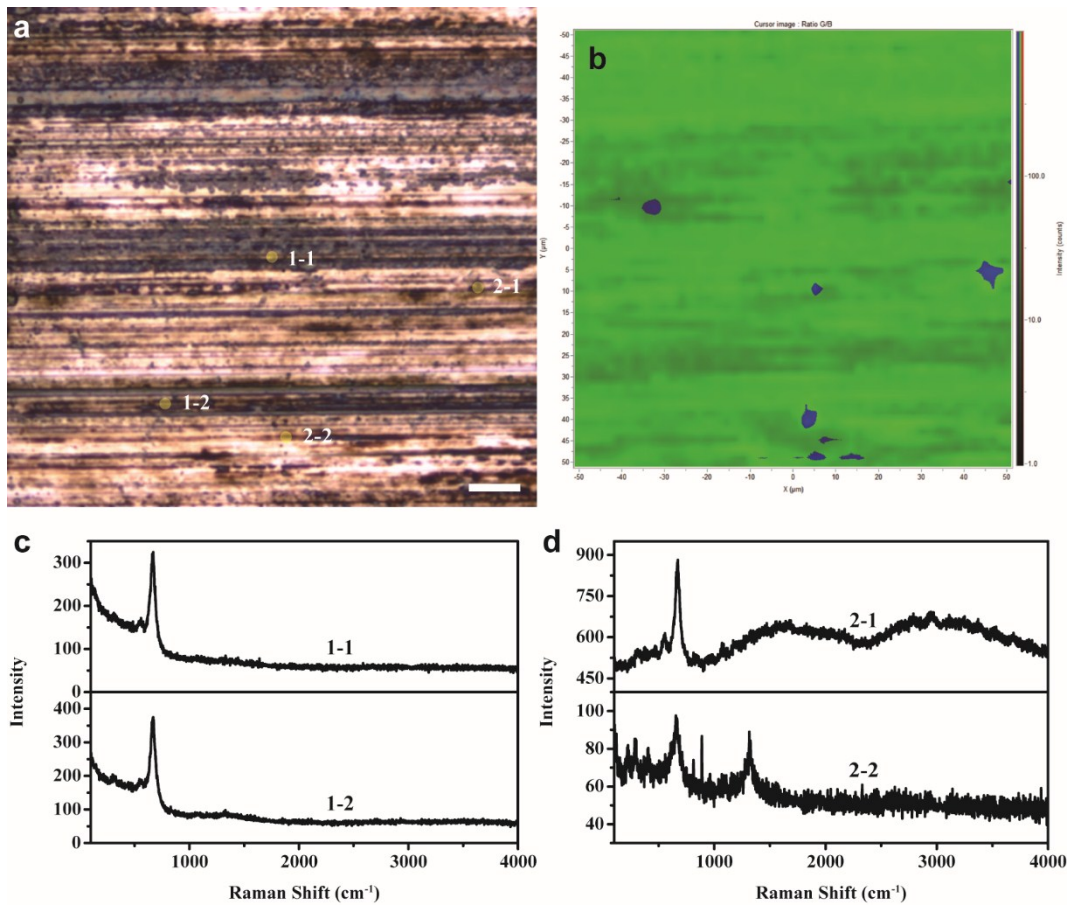

**Fig. S30** (a) Optical image of wear scar after the tribological test in pure PAO 2. (b) The points with different color are marked in the confocal Raman images. Green is 400-1000 cm<sup>-1</sup> and blue is 1000-1800 cm<sup>-1</sup>. (c, d) The corresponding Raman spectra.

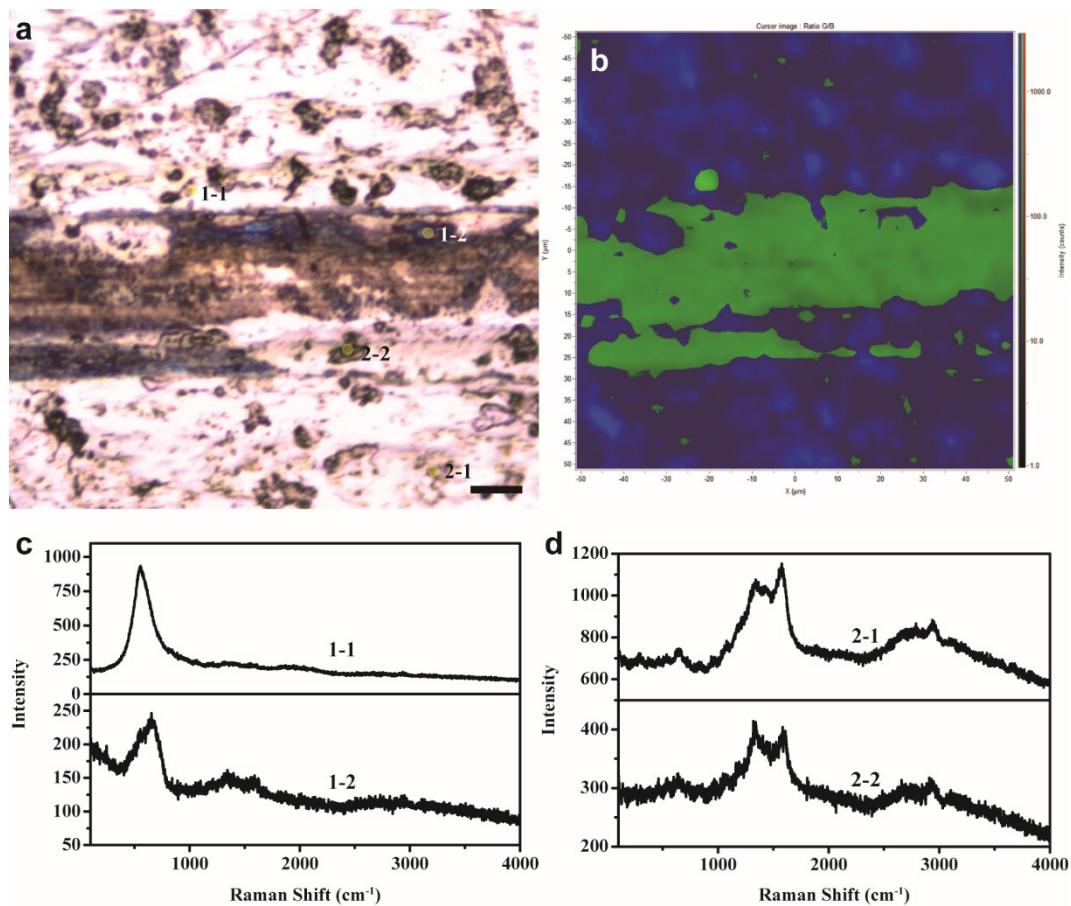

**Fig. S31** (a) Optical image of wear scar after the tribological test in 1000/1 water-containing PAO 2. (b) The points with different color are marked in the confocal Raman images. Green is 400-1000 cm<sup>-1</sup> and blue is 1000-1800 cm<sup>-1</sup>. (c, d) The corresponding Raman spectra.



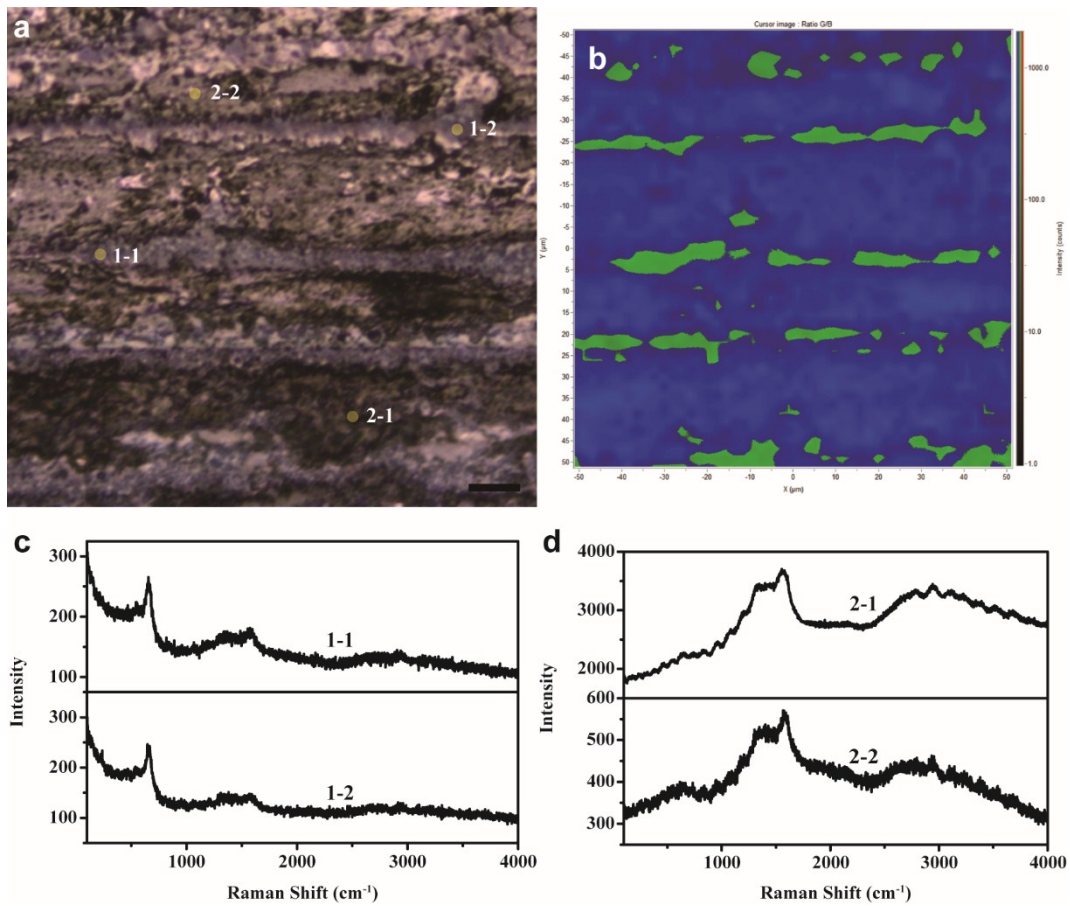

**Fig. S32** (a) Optical image of wear scar after the tribological test in 100/1 water-containing PAO 2. (b) The points with different color are marked in the confocal Raman images. Green is 400-1000 cm<sup>-1</sup> and blue is 1000-1800 cm<sup>-1</sup>. (c, d) The corresponding Raman spectra.

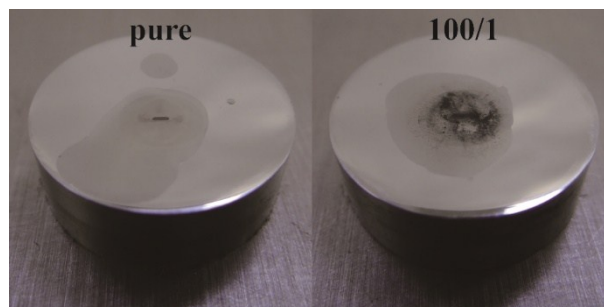

**Fig. S33** Photographs of the steel disks after the tribological tests in pure and 100/1 water-containing PAO 2.



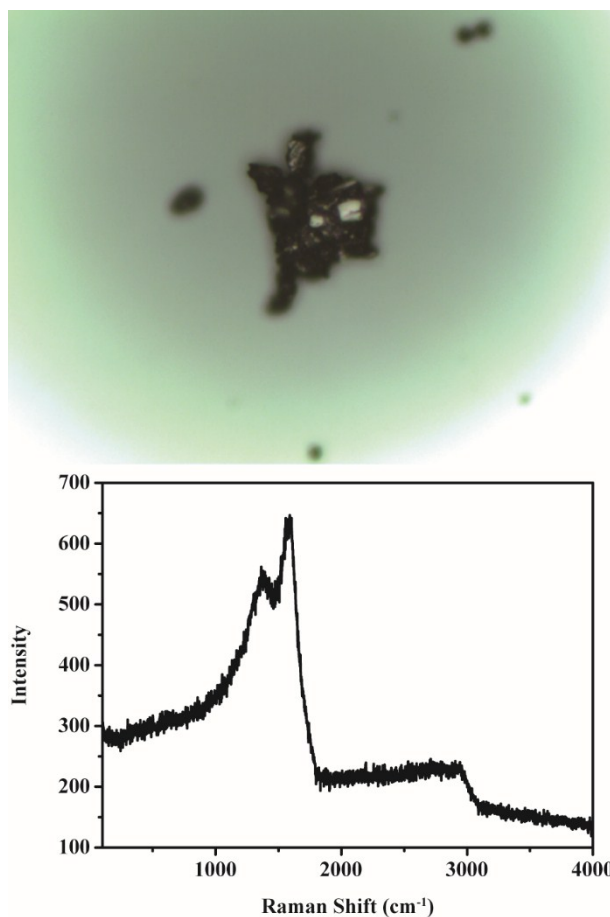

**Fig. S34** Optical image and Raman spectrum of wear debris produced from the tribological test in 100/1 water-containing PAO 2. The wear debris particles were deposited on silicon wafer.

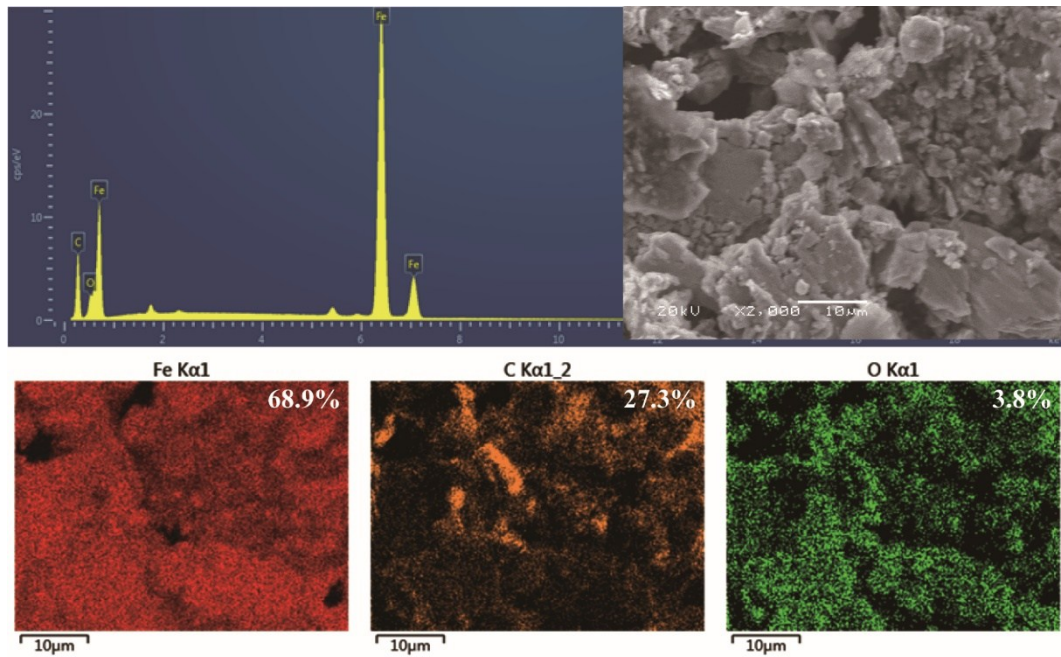

**Fig. S35** EDS spectra, SEM image, element mapping images, and element weight percentages of wear debris produced from the tribological test in 100/1 water-containing PAO 2. The wear debris particles were deposited on silicon wafer.
